# Supplementary material for: Establishment of 6 pediatric rhabdomyosarcoma patient’s derived xenograft models closely recapitulating patients’ tumor characteristics
Source: PubMed Central journal article supplement — Tumori. 2022 Sep 16;109(3):314–23. doi: 10.1177/03008916221110266 (PMC10248287; doi:10.1177/03008916221110266), 2022-09-16
Supplement: sj-pdf-2-tmj-10.1177_03008916221110266.pdf [file sj-pdf-2-tmj-10.1177_03008916221110266.pdf]

**SUPPLEMENTARY TABLE 1 Patient Derived Xenografts growth characteristics (P<sub>3</sub>)**

| Group | ID   | Lag Time (days) | Exponential growth (days) | Total growth (days) | Grafting Time (P <sub>1-3</sub> , days) | Diagnosis | Subtype | IRS |
|-------|------|-----------------|---------------------------|---------------------|-----------------------------------------|-----------|---------|-----|
| I     | PT9  | 20              | 35                        | 55                  | 220                                     | RMS       | ERMS    | III |
|       | PT14 | 15              | 45                        | 60                  | 240                                     | RMS       | ERMS    | IV  |
| II    | PT2  | 45              | 30                        | 75                  | 300                                     | RMS       | ARMS    | I   |
|       | PT3  | 35              | 30                        | 65                  | 260                                     | RMS       | Sc/Sp   | III |
|       | PT4  | 40              | 25                        | 65                  | 260                                     | RMS       | ERMS    | III |
| III   | PT13 | 55              | 50                        | 105                 | 420                                     | RMS       | ARMS    | IV  |

IRS= intergroup rhabdomyosarcoma studies; ERMS=embryonal rhabdomyosarcoma; ARMS=alveolar rhabdomyosarcoma
