# Supplementary figures and images for: Establishment of 6 pediatric rhabdomyosarcoma patient’s derived xenograft models closely recapitulating patients’ tumor characteristics
Source: PubMed Central journal article supplement — Tumori. 2022 Sep 16;109(3):314–23. doi: 10.1177/03008916221110266 (PMC10248287; doi:10.1177/03008916221110266), 2022-09-16

A)

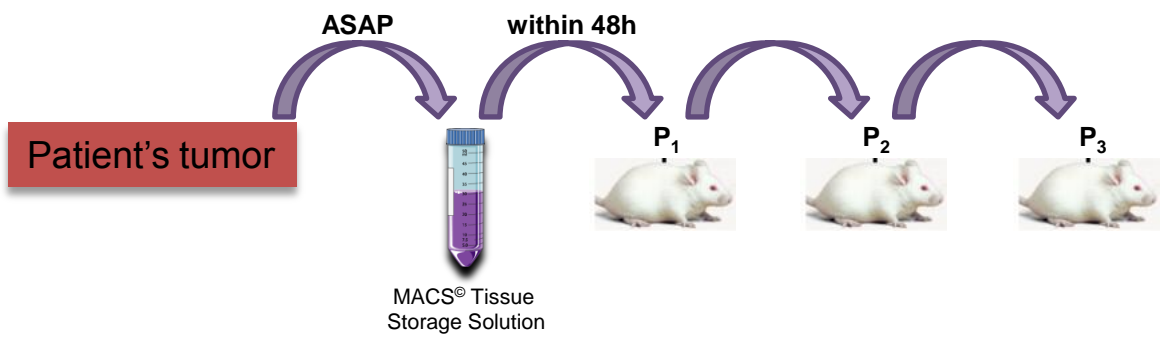

B)

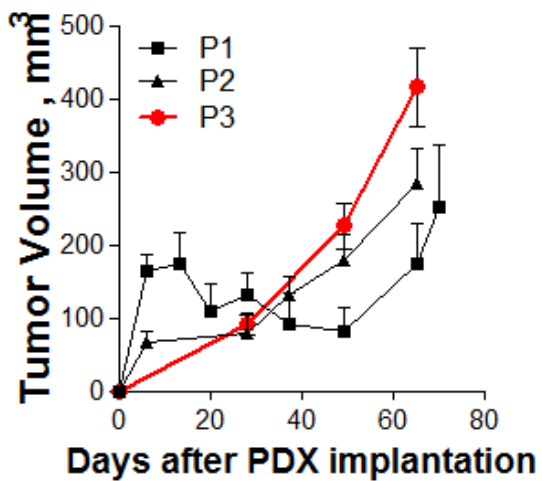

C)

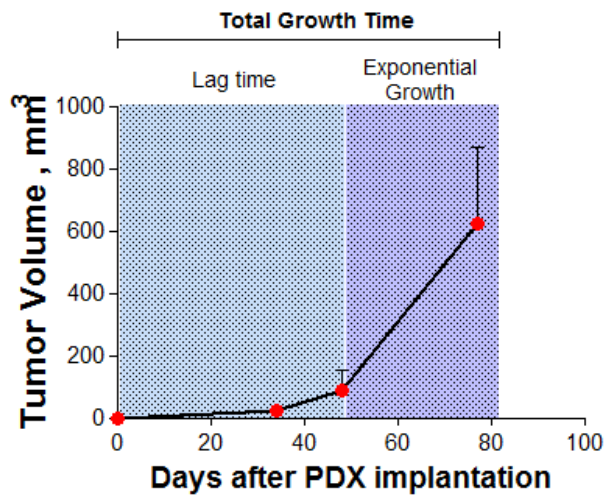

**ERMS (PT9)**

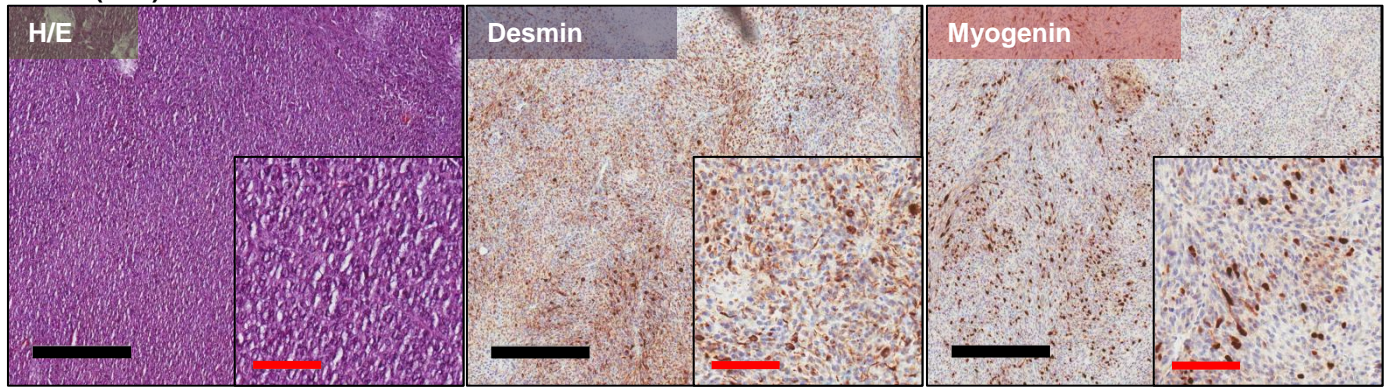

**ARMS (PT13)**

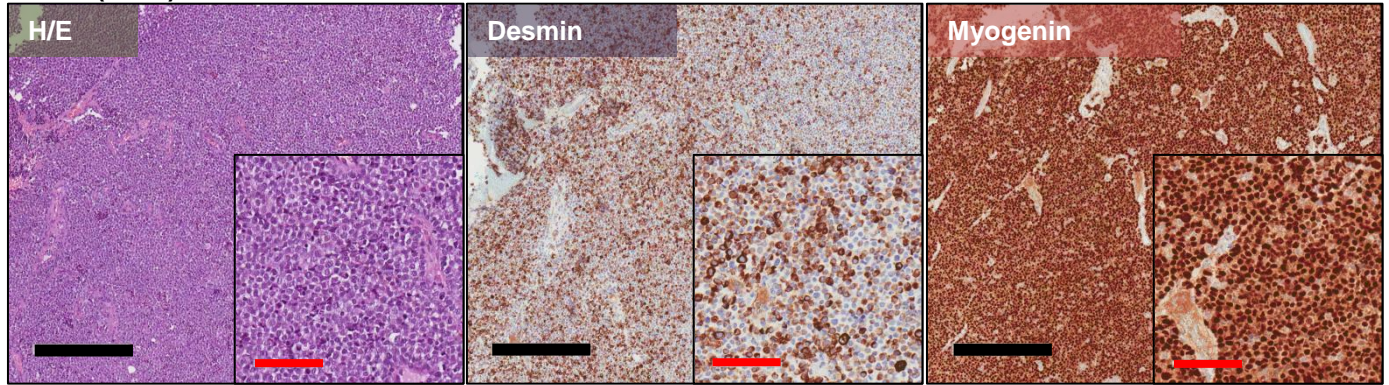

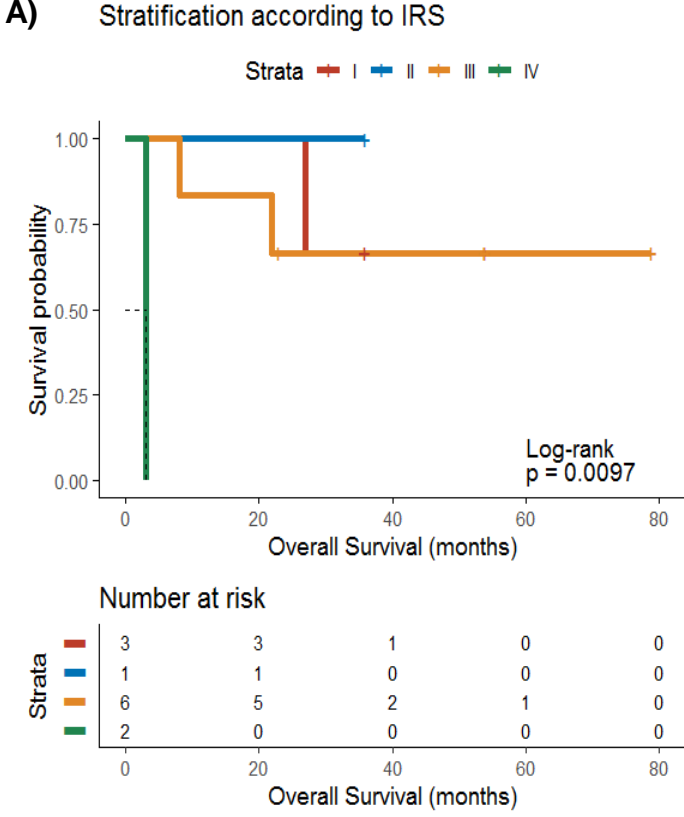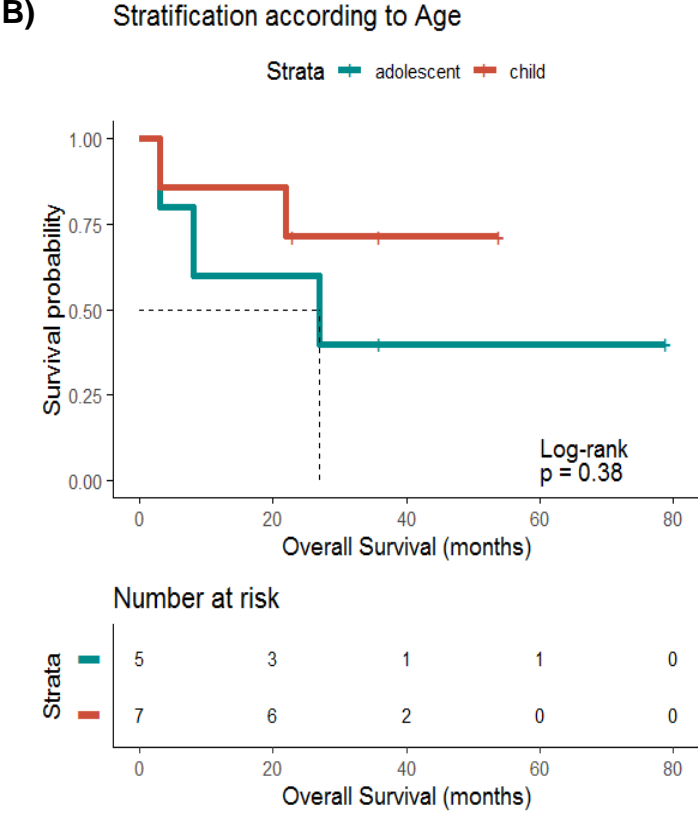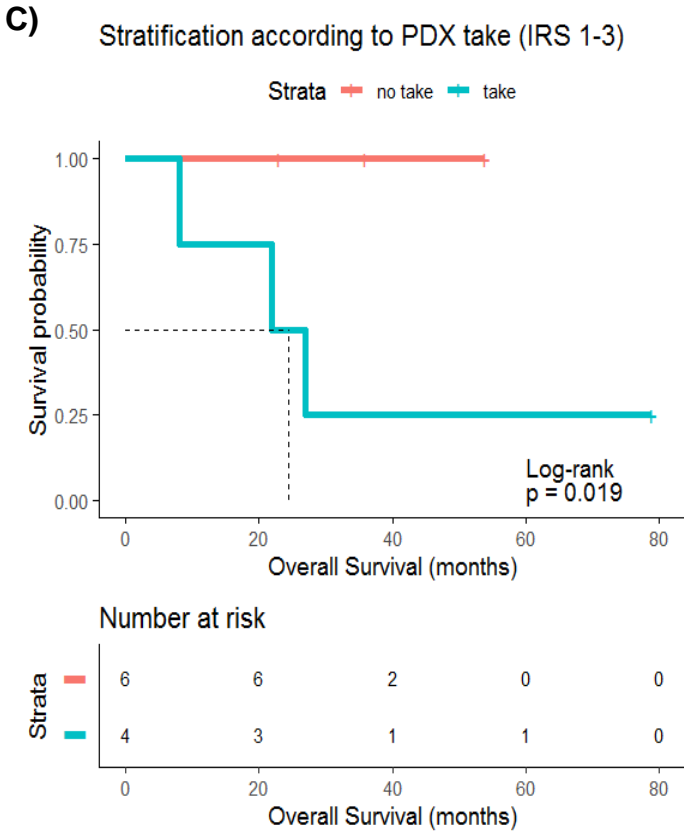

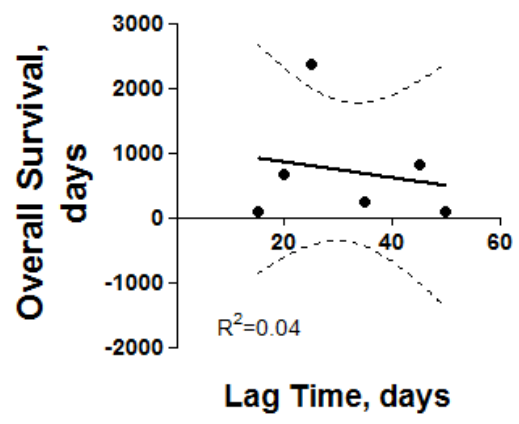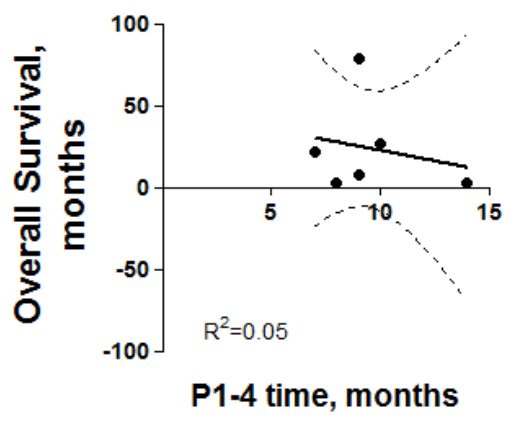

Supplement: sj-pdf-1-tmj-10.1177_03008916221110266.pdf [file sj-pdf-1-tmj-10.1177_03008916221110266.pdf]
